# Supplementary material
Source: publisher figshare collection journal article supplement (https://gsapubs.figshare.com/ndownloader/files/38279064)
Supplement: Supplementary file 1 [file 38279064]

## Sheet: Table S3
Terrane	Sample	Locality	Borehole depth (m)	Lithology	Strata	Adopted stratigraphy	143Nd/144Nd	2σ	εNd(0)	Reference
West Taiwan	KS152	Western Foothills	-	mudstone	Kuanyinshan Fm.	Middle Miocene	0.511942	8e-06	-13.5671	Lan et al. (2014)
West Taiwan	KS162	Western Foothills	-	mudstone	Kuanyinshan Fm.	Middle Miocene	0.511988	6e-06	-12.6778	Lan et al. (2014)
West Taiwan	KS166	Western Foothills	-	mudstone	Kuanyinshan Fm.	Middle Miocene	0.511979	6e-06	-12.8596	Lan et al. (2014)
West Taiwan	KS168A	Western Foothills	-	mudstone	Kuanyinshan Fm.	Middle Miocene	0.511939	6e-06	-13.6363	Lan et al. (2014)
West Taiwan	KS171	Western Foothills	-	mudstone	Talu Fm.	Middle Miocene	0.511895	6e-06	-14.4884	Lan et al. (2014)
West Taiwan	KS150	Western Foothills	-	mudstone	Talu Fm.	Middle Miocene	0.511969	8e-06	-13.0429	Lan et al. (2014)
West Taiwan	KS173	Western Foothills	-	mudstone	Talu Fm.	Middle Miocene	0.511948	8e-06	-13.4674	Lan et al. (2014)
West Taiwan	KS180	Western Foothills	-	mudstone	Talu Fm.	Middle Miocene	0.512011	6e-06	-12.2248	Lan et al. (2014)
West Taiwan	KS182	Western Foothills	-	mudstone	Peiliao Fm.	Lower Miocene	0.511942	6e-06	-13.5755	Lan et al. (2014)
West Taiwan	KS186	Western Foothills	-	mudstone	Peiliao Fm.	Lower Miocene	0.511961	8e-06	-13.1992	Lan et al. (2014)
West Taiwan	KS142	Western Foothills	-	mudstone	Peiliao Fm.	Lower Miocene	0.511959	6e-06	-13.2481	Lan et al. (2014)
West Taiwan	KS140	Western Foothills	-	mudstone	Shihti Fm.	Lower Miocene	0.511966	6e-06	-13.1042	Lan et al. (2014)
West Taiwan	KS198	Western Foothills	-	mudstone	Shihti Fm.	Lower Miocene	0.511945	8e-06	-13.5242	Lan et al. (2014)
West Taiwan	KS251	Western Foothills	-	mudstone	Shihti Fm.	Lower Miocene	0.511945	6e-06	-13.5156	Lan et al. (2014)
West Taiwan	KS257	Western Foothills	-	mudstone	Shihti Fm.	Lower Miocene	0.51197	8e-06	-13.0373	Lan et al. (2014)
West Taiwan	NT-14	Western Foothills	-	mudstone	Taliao Fm.	Lower Miocene	0.511967	8e-06	-13.0808	Lan et al. (2014)
West Taiwan	KS260	Western Foothills	-	mudstone	Taliao Fm.	Lower Miocene	0.511974	8e-06	-12.9569	Lan et al. (2014)
West Taiwan	KS104	Western Foothills	-	mudstone	Taliao Fm.	Lower Miocene	0.511987	6e-06	-12.6916	Lan et al. (2014)
West Taiwan	KS110	Western Foothills	-	mudstone	Taliao Fm.	Lower Miocene	0.511972	8e-06	-12.9895	Lan et al. (2014)
West Taiwan	KS264	Western Foothills	-	mudstone	Taliao Fm.	Lower Miocene	0.511983	6e-06	-12.7733	Lan et al. (2014)
West Taiwan	KS118	Western Foothills	-	mudstone	Taliao Fm.	Lower Miocene	0.511981	8e-06	-12.8081	Lan et al. (2014)
West Taiwan	KS119	Western Foothills	-	mudstone	Mushan Fm.	Lower Miocene	0.512014	6e-06	-12.1819	Lan et al. (2014)
West Taiwan	KS124	Western Foothills	-	mudstone	Mushan Fm.	Lower Miocene	0.512005	6e-06	-12.3559	Lan et al. (2014)
West Taiwan	KS272	Western Foothills	-	mudstone	Mushan Fm.	Lower Miocene	0.511997	8e-06	-12.4995	Lan et al. (2014)
West Taiwan	KS126	Western Foothills	-	mudstone	Mushan Fm.	Lower Miocene	0.511976	8e-06	-12.9136	Lan et al. (2014)
West Taiwan	KS276	Western Foothills	-	mudstone	Mushan Fm.	Lower Miocene	0.511976	8e-06	-12.9101	Lan et al. (2014)
West Taiwan	PL-SOIL5	Western Foothills	-	mudstone	Mushan Fm.	Lower Miocene	0.512026	6e-06	-11.9299	Lan et al. (2014)
West Taiwan	PL-SOIL6	Western Foothills	-	mudstone	Mushan Fm.	Lower Miocene	0.511975	8e-06	-12.93	Lan et al. (2014)
West Taiwan	PL-SOIL8	Western Foothills	-	mudstone	Mushan Fm.	Lower Miocene	0.512008	6e-06	-12.2933	Lan et al. (2014)
West Taiwan	NT-20	Western Foothills	-	mudstone	Shuichangliu Fm.	Oligocene	0.511993	8e-06	-12.5794	Lan et al. (2014)
West Taiwan	NT-21	Western Foothills	-	mudstone	Shuichangliu Fm.	Oligocene	0.511983	8e-06	-12.772	Lan et al. (2014)
West Taiwan	NT-22	Western Foothills	-	mudstone	Shuichangliu Fm.	Oligocene	0.511985	8e-06	-12.739	Lan et al. (2014)
West Taiwan	PL-SOIL4	Western Foothills	-	mudstone	Shuichangliu Fm.	Oligocene	0.512047	6e-06	-11.5267	Lan et al. (2014)
West Taiwan	PL-SOIL3	Western Foothills	-	mudstone	Shuichangliu Fm.	Oligocene	0.51203	6e-06	-11.863	Lan et al. (2014)
West Taiwan	PL-SOIL2	Western Foothills	-	mudstone	Shuichangliu Fm.	Oligocene	0.511877	8e-06	-14.8368	Lan et al. (2014)
West Taiwan	KS207	Western Foothills	-	mudstone	Shuichangliu Fm.	Oligocene	0.511981	8e-06	-12.819	Lan et al. (2014)
West Taiwan	KS279	Western Foothills	-	mudstone	Shuichangliu Fm.	Oligocene	0.511958	8e-06	-13.2647	Lan et al. (2014)
West Taiwan	KS211	Western Foothills	-	mudstone	Shuichangliu Fm.	Oligocene	0.51201	8e-06	-12.2547	Lan et al. (2014)
West Taiwan	KS215	Western Foothills	-	mudstone	Shuichangliu Fm.	Oligocene	0.511977	6e-06	-12.8982	Lan et al. (2014)
West Taiwan	KS219	Western Foothills	-	mudstone	Shuichangliu Fm.	Oligocene	0.511995	8e-06	-12.5506	Lan et al. (2014)
West Taiwan	KS223	Western Foothills	-	mudstone	Shuichangliu Fm.	Oligocene	0.512019	8e-06	-12.0678	Lan et al. (2014)
West Taiwan	KS230	Western Foothills	-	mudstone	Shuichangliu Fm.	Oligocene	0.512045	6e-06	-11.5748	Lan et al. (2014)
West Taiwan	KS235	Western Foothills	-	mudstone	Shuichangliu Fm.	Oligocene	0.512068	6e-06	-11.1149	Lan et al. (2014)
West Taiwan	0937	Western Foothills	-	mudstone	Shuichangliu Fm.	Oligocene	0.512024	6e-06	-11.9833	Lan et al. (2014)
West Taiwan	0936	Western Foothills	-	mudstone	Shuichangliu Fm.	Oligocene	0.512087	6e-06	-10.739	Lan et al. (2014)
West Taiwan	0934	Western Foothills	-	mudstone	Shuichangliu Fm.	Oligocene	0.512072	6e-06	-11.0495	Lan et al. (2014)
West Taiwan	0933	Western Foothills	-	mudstone	Shuichangliu Fm.	Oligocene	0.512155	6e-06	-9.4199	Lan et al. (2014)
West Taiwan	0932	Western Foothills	-	mudstone	Shuichangliu Fm.	Oligocene	0.512157	8e-06	-9.37367	Lan et al. (2014)
West Taiwan	0931	Western Foothills	-	mudstone	Shuichangliu Fm.	Oligocene	0.512118	6e-06	-10.1428	Lan et al. (2014)
West Taiwan	0930	Western Foothills	-	mudstone	Shuichangliu Fm.	Oligocene	0.512121	8e-06	-10.0857	Lan et al. (2014)
West Taiwan	SL11-1	Hsuehshan Range	-	mudstone	Szeleng Fm.	Upper Eocene-Lower Oligocene	0.512051	6e-06	-11.4473	Lan et al. (2014)
West Taiwan	SL11-2	Hsuehshan Range	-	mudstone	Szeleng Fm.	Upper Eocene-Lower Oligocene	0.51208	6e-06	-10.8779	Lan et al. (2014)
West Taiwan	SL11-3	Hsuehshan Range	-	mudstone	Szeleng Fm.	Upper Eocene-Lower Oligocene	0.51204	8e-06	-11.662	Lan et al. (2014)
West Taiwan	SL11-4	Hsuehshan Range	-	mudstone	Szeleng Fm.	Upper Eocene-Lower Oligocene	0.512111	8e-06	-10.2747	Lan et al. (2014)
West Taiwan	SL11-6	Hsuehshan Range	-	mudstone	Szeleng Fm.	Upper Eocene-Lower Oligocene	0.512105	8e-06	-10.4058	Lan et al. (2014)
West Taiwan	SL11-9	Hsuehshan Range	-	mudstone	Szeleng Fm.	Upper Eocene-Lower Oligocene	0.512077	8e-06	-10.9373	Lan et al. (2014)
West Taiwan	XC11-2	Hsuehshan Range	-	mudstone	Hsitsun Fm.	Middle(?)-Upper Eocene	0.512099	8e-06	-10.5119	Lan et al. (2014)
West Taiwan	XC11-3	Hsuehshan Range	-	mudstone	Hsitsun Fm.	Middle(?)-Upper Eocene	0.512121	6e-06	-10.0761	Lan et al. (2014)
Pearl River Mouth Basin	-	Borehole PY33	800	-	-	Pliocene	0.512018	6e-06	-12.0998	Shao et al. (2015)
Pearl River Mouth Basin	-	Borehole PY33	940	-	-	Pliocene	0.512015	7e-06	-12.1569	Shao et al. (2015)
Pearl River Mouth Basin	-	Borehole PY33	1000	-	-	Upper Miocene	0.512005	7e-06	-12.352	Shao et al. (2015)
Pearl River Mouth Basin	-	Borehole PY33	1300	-	-	Upper Miocene	0.512025	7e-06	-11.9599	Shao et al. (2015)
Pearl River Mouth Basin	-	Borehole PY33	1360	-	-	Upper Miocene	0.511971	8e-06	-13.0131	Shao et al. (2015)
Pearl River Mouth Basin	-	Borehole PY33	1480	-	-	Upper Miocene	0.511978	7e-06	-12.8669	Shao et al. (2015)
Pearl River Mouth Basin	-	Borehole PY33	1580	-	-	Middle Miocene	0.511998	7e-06	-12.4876	Shao et al. (2015)
Pearl River Mouth Basin	-	Borehole PY33	1780	-	-	Middle Miocene	0.512004	5e-06	-12.3695	Shao et al. (2015)
Pearl River Mouth Basin	-	Borehole PY33	1840	-	-	Middle Miocene	0.511987	6e-06	-12.6989	Shao et al. (2015)
Pearl River Mouth Basin	-	Borehole PY33	1900	-	-	Middle Miocene	0.511967	8e-06	-13.089	Shao et al. (2015)
Pearl River Mouth Basin	-	Borehole PY33	2080	-	-	Middle Miocene	0.512003	7e-06	-12.3815	Shao et al. (2015)
Pearl River Mouth Basin	-	Borehole PY33	2280	-	-	Middle Miocene	0.512003	1e-05	-12.3945	Shao et al. (2015)
Pearl River Mouth Basin	-	Borehole PY33	2300	-	-	Middle Miocene	0.512016	9e-06	-12.1426	Shao et al. (2015)
Pearl River Mouth Basin	-	Borehole PY33	2440	-	-	Middle Miocene	0.512043	6e-06	-11.6118	Shao et al. (2015)
Pearl River Mouth Basin	-	Borehole PY33	2550	-	-	Lower Miocene	0.512031	8e-06	-11.8362	Shao et al. (2015)
Pearl River Mouth Basin	-	Borehole PY33	2640	-	-	Lower Miocene	0.512013	8e-06	-12.186	Shao et al. (2015)
Pearl River Mouth Basin	-	Borehole PY33	2690	-	-	Lower Miocene	0.511988	8e-06	-12.6799	Shao et al. (2015)
Pearl River Mouth Basin	-	Borehole PY33	2780	-	-	Lower Miocene	0.512014	8e-06	-12.1763	Shao et al. (2015)
Pearl River Mouth Basin	-	Borehole PY33	2860	-	-	Lower Miocene	0.512028	8e-06	-11.9032	Shao et al. (2015)
Pearl River Mouth Basin	-	Borehole PY33	2940	-	-	Lower Miocene	0.512008	7e-06	-12.2934	Shao et al. (2015)
Pearl River Mouth Basin	-	Borehole PY33	3030	-	-	Lower Miocene	0.51199	8e-06	-12.6448	Shao et al. (2015)
Pearl River Mouth Basin	-	Borehole PY33	3100	-	-	Lower Miocene	0.511979	7e-06	-12.8497	Shao et al. (2015)
Pearl River Mouth Basin	-	Borehole PY33	3240	-	-	Lower Miocene	0.512018	8e-06	-12.0983	Shao et al. (2015)
Pearl River Mouth Basin	-	Borehole PY33	3305	-	-	Lower Miocene	0.511984	9e-06	-12.7663	Shao et al. (2015)
Pearl River Mouth Basin	-	Borehole PY33	3415	-	-	Lower Miocene	0.512013	8e-06	-12.1906	Shao et al. (2015)
Pearl River Mouth Basin	-	Borehole PY33	3580	-	-	Upper Oligocene	0.512041	9e-06	-11.6469	Shao et al. (2015)
Pearl River Mouth Basin	-	Borehole PY33	3645	-	-	Upper Oligocene	0.512069	9e-06	-11.0915	Shao et al. (2015)
Pearl River Mouth Basin	-	Borehole PY33	3795	-	-	Upper Oligocene	0.51208	8e-06	-10.8841	Shao et al. (2015)
Pearl River Mouth Basin	-	Borehole PY33	3905	-	-	Upper Oligocene	0.512081	8e-06	-10.8666	Shao et al. (2015)
Pearl River Mouth Basin	-	Borehole PY33	4005	-	-	Lower Oligocene	0.512085	9e-06	-10.7801	Shao et al. (2015)
Pearl River Mouth Basin	-	Borehole PY33	4140	-	-	Lower Oligocene	0.51208	7e-06	-10.8784	Shao et al. (2015)
Pearl River Mouth Basin	-	Borehole PY33	4265	-	-	Lower Oligocene	0.512061	7e-06	-11.2567	Shao et al. (2015)
Pearl River Mouth Basin	-	Borehole PY33	4345	-	-	Lower Oligocene	0.51209	8e-06	-10.6904	Shao et al. (2015)
Pearl River Mouth Basin	-	Borehole PY33	4465	-	-	Lower Oligocene	0.512071	9e-06	-11.0617	Shao et al. (2015)
Pearl River Mouth Basin	-	Borehole PY33	4520	-	-	Lower Oligocene	0.51209	9e-06	-10.6843	Shao et al. (2015)
Pearl River Mouth Basin	-	Borehole PY33	4850	-	-	Lower Oligocene	0.51208	7e-06	-10.8794	Shao et al. (2015)
Pearl River Mouth Basin	BY701	Borehole BY7-1-1	-	mudstone	-	Upper Miocene	0.511983	6e-06	-12.77	Yan et al. (2018)
Pearl River Mouth Basin	BY702	Borehole BY7-1-1	-	mudstone	-	Upper Miocene	0.511991	6e-06	-12.62	Yan et al. (2018)
Pearl River Mouth Basin	BY703	Borehole BY7-1-1	-	mudstone	-	Upper Miocene	0.512012	7e-06	-12.22	Yan et al. (2018)
Pearl River Mouth Basin	BY704	Borehole BY7-1-1	-	mudstone	-	Middle Miocene	0.511959	6e-06	-13.25	Yan et al. (2018)
Pearl River Mouth Basin	BY705	Borehole BY7-1-1	-	mudstone	-	Middle Miocene	0.511939	7e-06	-13.64	Yan et al. (2018)
Pearl River Mouth Basin	BY706	Borehole BY7-1-1	-	mudstone	-	Middle Miocene	0.511968	7e-06	-13.06	Yan et al. (2018)
Pearl River Mouth Basin	BY707	Borehole BY7-1-1	-	siltstone	-	Middle Miocene	0.511973	7e-06	-12.98	Yan et al. (2018)
Pearl River Mouth Basin	BY708	Borehole BY7-1-1	-	mudstone	-	Middle Miocene	0.511924	7e-06	-13.94	Yan et al. (2018)
Pearl River Mouth Basin	BY709	Borehole BY7-1-1	-	mudstone	-	Middle Miocene	0.511992	5e-06	-12.59	Yan et al. (2018)
Pearl River Mouth Basin	BY710	Borehole BY7-1-1	-	mudstone	-	Middle Miocene	0.511993	6e-06	-12.58	Yan et al. (2018)
Pearl River Mouth Basin	BY711	Borehole BY7-1-1	-	mudstone	-	Lower Miocene	0.512002	9e-06	-12.4	Yan et al. (2018)
Pearl River Mouth Basin	BY712	Borehole BY7-1-1	-	mudstone	-	Lower Miocene	0.512	5e-06	-12.44	Yan et al. (2018)
Pearl River Mouth Basin	BY713	Borehole BY7-1-1	-	siltstone	-	Lower Miocene	0.512087	7e-06	-10.74	Yan et al. (2018)
Pearl River Mouth Basin	BY729	Borehole BY7-1-1	-	mudstone	-	Upper Oligocene	0.512164	7e-06	-9.25	Yan et al. (2018)
Pearl River Mouth Basin	BY730	Borehole BY7-1-1	-	mudstone	-	Upper Oligocene	0.512256	6e-06	-7.44	Yan et al. (2018)
Pearl River Mouth Basin	BY738	Borehole BY7-1-1	-	siltstone	-	Lower Oligocene	0.512233	7e-06	-7.9	Yan et al. (2018)
Pearl River Mouth Basin	BY740	Borehole BY7-1-1	-	siltstone	-	Upper Eocene	0.512229	5e-06	-7.98	Yan et al. (2018)
Pearl River Mouth Basin	BY743	Borehole BY7-1-1	-	siltstone	-	Upper Eocene	0.512305	7e-06	-6.49	Yan et al. (2018)
Continent-ocean transition zone	1148A18H01W50-52	Site 1148	165.63	-	-	Pliocene	0.512029	9e-06	-11.873	Li et al. (2003)
Continent-ocean transition zone	1148A21X01W50-52	Site 1148	194.53	-	-	Upper Miocene	0.512019	8.19195e-06	-12.0694	Li et al. (2003)
Continent-ocean transition zone	1148A22X04W50-52	Site 1148	208.73	-	-	Upper Miocene	0.512008	8.19177e-06	-12.2887	Li et al. (2003)
Continent-ocean transition zone	1148A24X01W50-52	Site 1148	223.53	-	-	Upper Miocene	0.512061	1.25548e-05	-11.2624	Li et al. (2003)
Continent-ocean transition zone	1148A25X04W50-52	Site 1148	237.63	-	-	Upper Miocene	0.512007	1.02397e-05	-12.3147	Li et al. (2003)
Continent-ocean transition zone	1148A27X01W50-52	Site 1148	252.33	-	-	Upper Miocene	0.512054	1.35751e-05	-11.3975	Li et al. (2003)
Continent-ocean transition zone	1148A28X04W50-52	Site 1148	266.43	-	-	Upper Miocene	0.511995	1.02399e-05	-12.5392	Li et al. (2003)
Continent-ocean transition zone	1148A29X04W50-52	Site 1148	276.03	-	-	Upper Miocene	0.511984	6.14381e-06	-12.7538	Li et al. (2003)
Continent-ocean transition zone	1148A30X04W50-52	Site 1148	285.63	-	-	Upper Miocene	0.512007	6e-06	-12.3109	Li et al. (2003)
Continent-ocean transition zone	1148A31X04W50-52	Site 1148	295.23	-	-	Middle Miocene	0.512002	1e-05	-12.4067	Li et al. (2003)
Continent-ocean transition zone	1148A32X04W50-52	Site 1148	304.83	-	-	Middle Miocene	0.511969	1.2e-05	-13.0506	Li et al. (2003)
Continent-ocean transition zone	1148A33X04W50-52	Site 1148	314.53	-	-	Middle Miocene	0.511987	9e-06	-12.6955	Li et al. (2003)
Continent-ocean transition zone	1148A34X01W50-52	Site 1148	319.63	-	-	Middle Miocene	0.512009	1e-05	-12.2712	Li et al. (2003)
Continent-ocean transition zone	1148A34X04W50-52	Site 1148	324.13	-	-	Middle Miocene	0.511992	8e-06	-12.6051	Li et al. (2003)
Continent-ocean transition zone	1148A35X04W50-52	Site 1148	333.83	-	-	Lower Miocene	0.512036	8e-06	-11.7394	Li et al. (2003)
Continent-ocean transition zone	1148A36X04W50-52	Site 1148	343.43	-	-	Lower Miocene	0.511998	8e-06	-12.4936	Li et al. (2003)
Continent-ocean transition zone	1148A37X04W50-52	Site 1148	353.03	-	-	Lower Miocene	0.512005	8e-06	-12.3492	Li et al. (2003)
Continent-ocean transition zone	1148A38X04W50-52	Site 1148	362.53	-	-	Lower Miocene	0.511998	7e-06	-12.4814	Li et al. (2003)
Continent-ocean transition zone	1148A39X04W50-52	Site 1148	372.13	-	-	Lower Miocene	0.512005	9e-06	-12.3546	Li et al. (2003)
Continent-ocean transition zone	1148A40X03W75-76	Site 1148	380.47	-	-	Lower Miocene	0.511975	9e-06	-12.9236	Li et al. (2003)
Continent-ocean transition zone	1148A41X03W75-76	Site 1148	390.17	-	-	Lower Miocene	0.511991	9e-06	-12.6136	Li et al. (2003)
Continent-ocean transition zone	1148A42X01W75-76	Site 1148	396.87	-	-	Lower Miocene	0.511976	1e-05	-12.9198	Li et al. (2003)
Continent-ocean transition zone	1148A42X03W75-76	Site 1148	399.87	-	-	Lower Miocene	0.512005	8.19086e-06	-12.3519	Li et al. (2003)
Continent-ocean transition zone	1148A43X03W75-76	Site 1148	409.47	-	-	Lower Miocene	0.511956	8.08363e-06	-13.309	Li et al. (2003)
Continent-ocean transition zone	1148A44X03W75-76	Site 1148	419.17	-	-	Lower Miocene	0.512012	8.08363e-06	-12.2195	Li et al. (2003)
Continent-ocean transition zone	1148A45X01W75-76	Site 1148	425.87	-	-	Lower Miocene	0.511995	9e-06	-12.543	Li et al. (2003)
Continent-ocean transition zone	1148A45X03W75-76	Site 1148	428.87	-	-	Lower Miocene	0.512033	7e-06	-11.8081	Li et al. (2003)
Continent-ocean transition zone	1148A46X03W75-76	Site 1148	438.47	-	-	Lower Miocene	0.51201	6e-06	-12.2442	Li et al. (2003)
Continent-ocean transition zone	1148A47X01W75-76	Site 1148	445.17	-	-	Lower Miocene	0.511997	4e-06	-12.504	Li et al. (2003)
Continent-ocean transition zone	1148A47X03W75-76	Site 1148	448.17	-	-	Lower Miocene	0.511981	8.19099e-06	-12.8145	Li et al. (2003)
Continent-ocean transition zone	1148A48X03W75-76	Site 1148	457.77	-	-	Upper Oligocene	0.512011	7.16724e-06	-12.2297	Li et al. (2003)
Continent-ocean transition zone	1148A49X03W85-87	Site 1148	467.37	-	-	Upper Oligocene	0.512041	8.19167e-06	-11.6538	Li et al. (2003)
Continent-ocean transition zone	1148A50X01W45-47	Site 1148	473.67	-	-	Upper Oligocene	0.512051	1.02401e-05	-11.4506	Li et al. (2003)
Continent-ocean transition zone	1148A50X02W75-76	Site 1148	476.97	-	-	Upper Oligocene	0.512041	9.68132e-06	-11.6423	Li et al. (2003)
Continent-ocean transition zone	1148A51X01W10-11	Site 1148	480.32	-	-	Upper Oligocene	0.51209	1.2e-05	-10.6954	Li et al. (2003)
Continent-ocean transition zone	1148A52XCCW10-11	Site 1148	489.42	-	-	Lower Oligocene	0.51214	1.02419e-05	-9.71848	Li et al. (2003)
Continent-ocean transition zone	1148A53X01W10-11	Site 1148	490.02	-	-	Lower Oligocene	0.512131	1.02412e-05	-9.89311	Li et al. (2003)
Continent-ocean transition zone	1148A53XCCW10-11	Site 1148	494.02	-	-	Lower Oligocene	0.512069	1e-05	-11.1091	Li et al. (2003)
Continent-ocean transition zone	1148A54X01W10-11	Site 1148	495.02	-	-	Lower Oligocene	0.512062	9.21556e-06	-11.24	Li et al. (2003)
Continent-ocean transition zone	1148A55X01W10-11	Site 1148	499.62	-	-	Lower Oligocene	0.512065	1.1e-05	-11.1706	Li et al. (2003)
Continent-ocean transition zone	1148A55XCCW10-11	Site 1148	504.62	-	-	Lower Oligocene	0.512074	1e-05	-11.0037	Li et al. (2003)
Continent-ocean transition zone	1148A56X01W75-76	Site 1148	505.27	-	-	Lower Oligocene	0.51212	1.12651e-05	-10.112	Li et al. (2003)
Continent-ocean transition zone	1148A56XCCW10-11	Site 1148	513.62	-	-	Lower Oligocene	0.512069	1.2e-05	-11.1051	Li et al. (2003)
Continent-ocean transition zone	1148A58X03W75-76	Site 1148	526.97	-	-	Lower Oligocene	0.512095	1.2e-05	-10.594	Li et al. (2003)
Continent-ocean transition zone	1148A59X01W75-76	Site 1148	533.97	-	-	Lower Oligocene	0.512105	8.19254e-06	-10.3986	Li et al. (2003)
Continent-ocean transition zone	1148A59X03W75-76	Site 1148	536.97	-	-	Lower Oligocene	0.512074	1.3e-05	-11.0024	Li et al. (2003)
Continent-ocean transition zone	1148A60X01W10-11	Site 1148	542.92	-	-	Lower Oligocene	0.512098	8.19271e-06	-10.5284	Li et al. (2003)
Continent-ocean transition zone	1148A60XCCW10-11	Site 1148	551.92	-	-	Lower Oligocene	0.512083	1e-05	-10.8337	Li et al. (2003)
Continent-ocean transition zone	1148A61X01W75-76	Site 1148	553.17	-	-	Lower Oligocene	0.512083	9.2167e-06	-10.818	Li et al. (2003)
Continent-ocean transition zone	1148A62X03W75-76	Site 1148	565.87	-	-	Lower Oligocene	0.512058	8e-06	-11.3224	Li et al. (2003)
Continent-ocean transition zone	1148A63X03W75-76	Site 1148	575.47	-	-	Lower Oligocene	0.51207	9e-06	-11.0863	Li et al. (2003)
Continent-ocean transition zone	1148A64X03W75-76	Site 1148	585.07	-	-	Lower Oligocene	0.512104	9e-06	-10.4252	Li et al. (2003)
Continent-ocean transition zone	1148A65X01W75-76	Site 1148	591.77	-	-	Lower Oligocene	0.512113	1.12658e-05	-10.2451	Li et al. (2003)
Continent-ocean transition zone	1148A66X01W25-27	Site 1148	600.87	-	-	Lower Oligocene	0.512073	8.19271e-06	-11.0119	Li et al. (2003)
Continent-ocean transition zone	1148A68X01W25-27	Site 1148	620.07	-	-	Lower Oligocene	0.512114	7.16931e-06	-10.2151	Li et al. (2003)
Continent-ocean transition zone	1148A70X01W25-27	Site 1148	639.27	-	-	Lower Oligocene	0.512057	9.7713e-06	-11.3393	Li et al. (2003)
Continent-ocean transition zone	1148A71X01W25-27	Site 1148	648.97	-	-	Lower Oligocene	0.512084	1.1e-05	-10.807	Li et al. (2003)
Continent-ocean transition zone	1148A72X01W25-27	Site 1148	658.39	-	-	Lower Oligocene	0.512088	8.19277e-06	-10.7232	Li et al. (2003)
Continent-ocean transition zone	1148A73X01W25-27	Site 1148	668.37	-	-	Lower Oligocene	0.512088	1.04359e-05	-10.7217	Li et al. (2003)
Continent-ocean transition zone	1148A75X01W25-27	Site 1148	687.67	-	-	Lower Oligocene	0.512123	6.14466e-06	-10.0387	Li et al. (2003)
Continent-ocean transition zone	1148A76X01W25-27	Site 1148	697.27	-	-	Lower Oligocene	0.512129	7.1689e-06	-9.92533	Li et al. (2003)
Continent-ocean transition zone	1148B39X01W25-27	Site 1148	706.3	-	-	Lower Oligocene	0.512087	1.4e-05	-10.7506	Li et al. (2003)
Continent-ocean transition zone	1148B41X01W25-27	Site 1148	725.6	-	-	Lower Oligocene	0.512066	9e-06	-11.1494	Li et al. (2003)
Continent-ocean transition zone	1148B44X01W25-27	Site 1148	754.5	-	-	Lower Oligocene	0.512153	7.16923e-06	-9.46633	Li et al. (2003)
Continent-ocean transition zone	1148B46X01W25-27	Site 1148	773.4	-	-	Lower Oligocene	0.512176	9.21801e-06	-9.00886	Li et al. (2003)
Continent-ocean transition zone	1148B48X01W25-27	Site 1148	791.3	-	-	Lower Oligocene	0.512127	6e-06	-9.9619	Li et al. (2003)
Continent-ocean transition zone	1148B50X01W25-27	Site 1148	810.6	-	-	Lower Oligocene	0.512149	8e-06	-9.53451	Li et al. (2003)
Continent-ocean transition zone	1148B52X01W25-27	Site 1148	821.2	-	-	Lower Oligocene	0.512092	9e-06	-10.6558	Li et al. (2003)
Continent-ocean transition zone	1148B53X01W25-27	Site 1148	825.8	-	-	Lower Oligocene	0.512122	7.16892e-06	-10.073	Li et al. (2003)
Continent-ocean transition zone	1148B55X01W25-27	Site 1148	840.5	-	-	Lower Oligocene	0.512144	9e-06	-9.63206	Li et al. (2003)
Continent-ocean transition zone	1148B56X01W25-27	Site 1148	850.1	-	-	Lower Oligocene	0.512141	1.22896e-05	-9.69197	Li et al. (2003)
Yinggehai-Qiongdongnan Basins	Y-ygh	Borehole DF29-1-2	-	mudstone	Yinggehai Fm.	Pliocene	0.51219	1e-05	-8.74	Yan et al. (2007)
Yinggehai-Qiongdongnan Basins	Y-yh2	Borehole DF1-1-5	-	mudstone	Huangliu Fm.	Upper Miocene	0.512083	1e-05	-10.8	Yan et al. (2007)
Yinggehai-Qiongdongnan Basins	Y-yh1	Borehole DF1-1-5	-	siltstone	Huangliu Fm.	Upper Miocene	0.512071	1e-05	-11.1	Yan et al. (2007)
Yinggehai-Qiongdongnan Basins	Y-hl	Borehole DF1-1-11	-	sandstone	Huangliu Fm.	Upper Miocene	0.51214	1e-05	-9.71	Yan et al. (2007)
Yinggehai-Qiongdongnan Basins	Y-msh1	Borehole YIN6	-	calcareous sandstone	Meishan Fm.	Middle Miocene	0.512181	1e-05	-8.92	Yan et al. (2007)
Yinggehai-Qiongdongnan Basins	Y-msh2	Borehole LT9-1-1	-	sandstone	Meishan Fm.	Middle Miocene	0.512529	1.2e-05	-2.13	Yan et al. (2007)
Yinggehai-Qiongdongnan Basins	Q-msh	Borehole YC7-4-1	-	calcareous mudstone	Meishan Fm.	Middle Miocene	0.512258	1e-05	-7.41	Yan et al. (2007)
Yinggehai-Qiongdongnan Basins	Y-sya	Borehole LT9-1-1	-	sandstone	Sanya Fm.	Lower Miocene	0.512421	1e-05	-4.24	Yan et al. (2007)
Yinggehai-Qiongdongnan Basins	Q-sya	Borehole YC13-1-8	-	sandstone	Sanya Fm.	Lower Miocene	0.512263	1.3e-05	-7.32	Yan et al. (2007)
Yinggehai-Qiongdongnan Basins	Q-1sh	Borehole YC21-1-3	-	sandstone	Lingshui Fm.	Upper Oligocene	0.512368	1.2e-05	-5.26	Yan et al. (2007)
Yinggehai-Qiongdongnan Basins	Q-ych	Borehole YC8-2-1	-	sandstone	Yacheng Fm.	Lower Oligocene	0.512259	1.2e-05	-7.4	Yan et al. (2007)
Hanoi Basin	-	Borehole LK 64	741	silty shale	Tien Hung Fm.	Upper Miocene	0.512027	4e-06	-11.9	Clift et al. (2006)
Hanoi Basin	-	Borehole LK 81	1108	sandstone	Tien Hung Fm.	Upper Miocene	0.512094	6e-06	-10.6	Clift et al. (2006)
Hanoi Basin	-	Borehole LK 41	444	sandstone	Phu Cu Fm.	Middle Miocene	0.512057	6e-06	-11.3	Clift et al. (2006)
Hanoi Basin	-	Borehole LK 108	1344	siltstone	Phu Cu Fm.	Middle Miocene	0.512021	3e-06	-12	Clift et al. (2006)
Hanoi Basin	-	Borehole LK 200	2643	sandstone	Phu Cu Fm.	Lower Miocene	0.512159	2e-06	-9.3	Clift et al. (2006)
Hanoi Basin	-	Borehole LK 203	2511	shale	Phong Chau Fm.	Lower Miocene	0.512103	4e-06	-10.4	Clift et al. (2006)
Hanoi Basin	-	Borehole LK 203	2846	sandstone	Phong Chau Fm.	Upper Oligocene	0.51206	3e-06	-11.3	Clift et al. (2006)
Hanoi Basin	-	Borehole LK 81	1986	shale	Dinh Cao Fm.	Lower/Upper Oligocene	0.51203	6e-06	-11.9	Clift et al. (2006)
Hanoi Basin	-	Borehole LK 81	2250	shale	Dinh Cao Fm.	Lower Oligocene	0.511949	5e-06	-13.4	Clift et al. (2006)
Hanoi Basin	-	Borehole LK 104	3590	conglomerate	Phu Tien Fm.	Upper Eocene	0.51178	1.2e-05	-16.7	Clift et al. (2006)
Hanoi Basin	-	Borehole LK 106	3910	shale	Phu Tien Fm.	Upper Eocene	0.511862	8e-06	-15.1	Clift et al. (2006)
